# Supplementary material for: The folding mechanism and key metastable state identification of the PrP127–147 monomer studied by molecular dynamics simulations and Markov state model analysis
Source: Royal Society of Chemistry journal article supplement (doi:10.1039/c7cp01521f), 2017-01-01
Supplement: c7cp01521f1.pdf [file c7cp01521f1.pdf]

**The Folding Mechanism and Key Metastable State  
Identification of the PrP127-147 Monomer Studied by  
Molecular Dynamics Simulation and Markov State Model  
Analysis**

Shuangyan Zhou,<sup>a</sup> Qianqian Wang,<sup>b</sup> Yuwei Wang,<sup>b</sup> Xiaojun Yao,<sup>bc</sup> Wei, Han<sup>d\*</sup>,

Huanxiang Liu<sup>\*a</sup>

<sup>a</sup>School of Pharmacy, Lanzhou University, Lanzhou 730000, China

<sup>b</sup>State Key Laboratory of Quality Research in Chinese Medicine, Macau Institute for Applied  
Research in Medicine and Health, Macau University of Science and Technology, Taipa, Macau,  
China

<sup>c</sup>State Key Laboratory of Applied Organic Chemistry and Department of Chemistry, Lanzhou  
University, Lanzhou 730000, China

<sup>d</sup>Laboratory of Chemical Genomics, School of Chemical biology and Biotechnology, Beijing  
University Shenzhen Graduate School, Shenzhen, China

\* Corresponding author

Tel.: +86-931-891-2578

Fax: +86-931-891-2582

E-mail address: [hxliu@lzu.edu.cn](mailto:hxliu@lzu.edu.cn) and [hanw@pkusz.edu.cn](mailto:hanw@pkusz.edu.cn).

### Figure caption

**Fig. S1.** The representative structures of macrostates S(16), S(8) and S(2) with  $\beta$ -sheet formed at the N-terminus and the hydrophobic residues are shown as sphere.

**Fig. S2.** The ensemble-averaged intrapeptide backbone H-bond map of the synthetic MSM trajectory. The contacts (i, i), (i, i+1) and (i, i+2) are not included.

**Fig. S3.** The superposition of structures in S(28). (a) the guanidyl of Arg136 was paralleled with the imidazole plane of His140, and (b) H-bond was formed between guanidyl of Arg136 and the N<sub>δ</sub> of imidazole of His140.

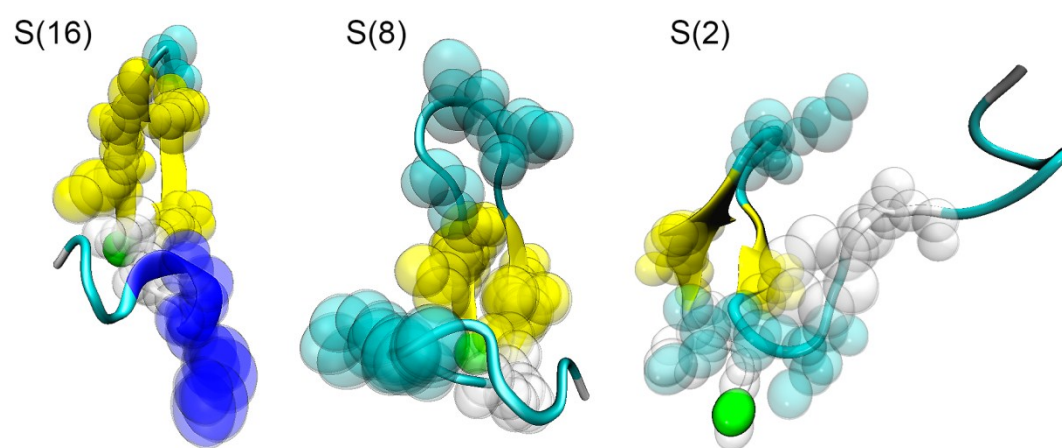

Figure S1

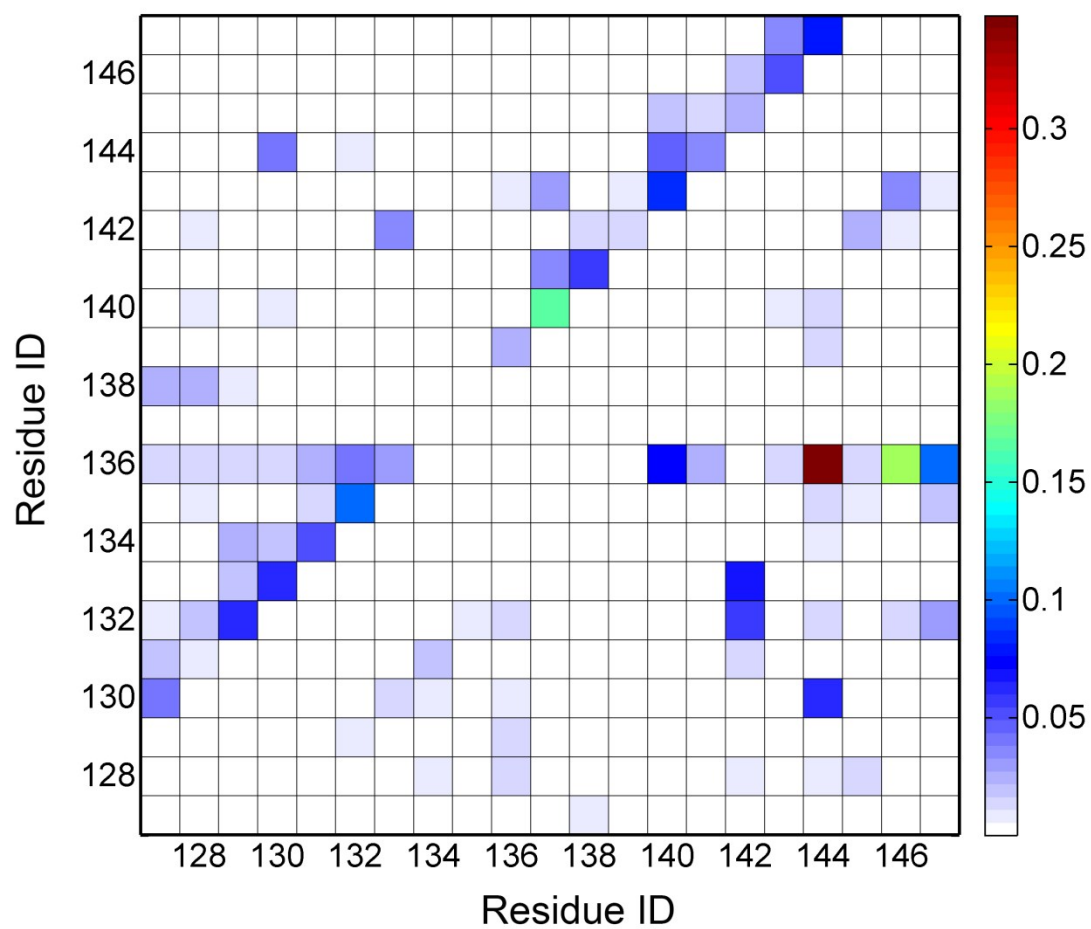

Figure S2

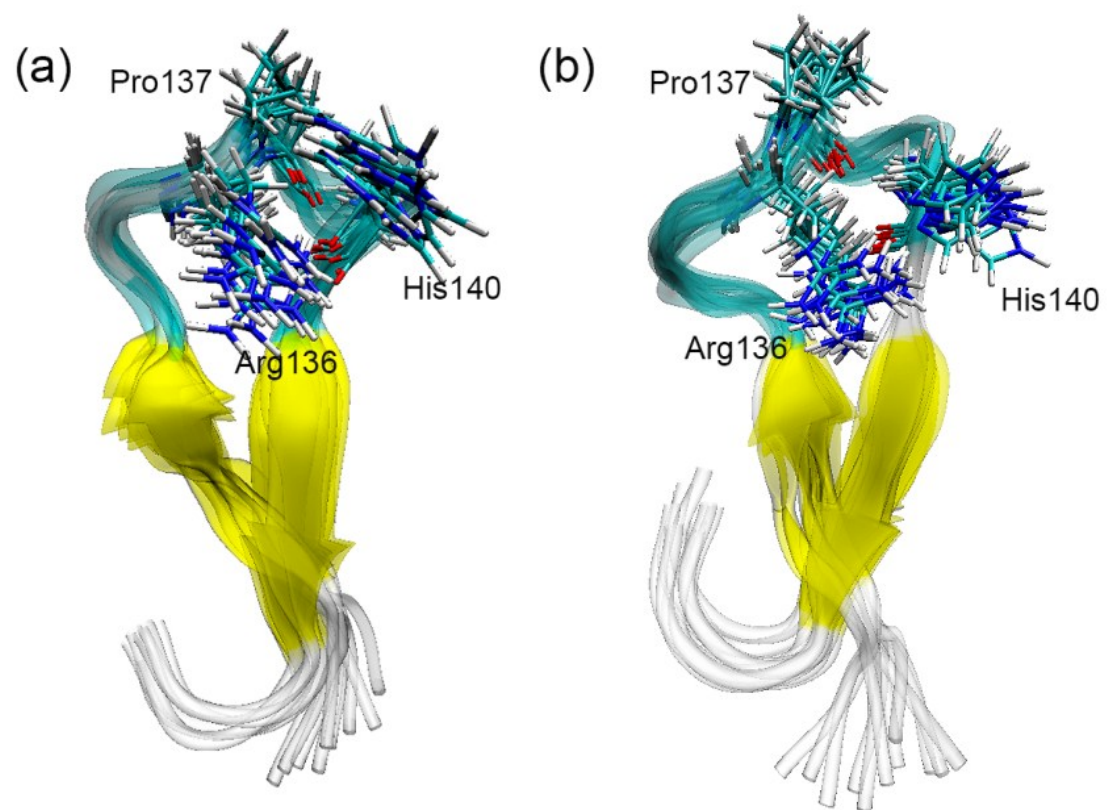

Figure S3
